# Supplementary material
Source: PubMed Central journal article supplement (PMC3217905)
Supplement: NIHMS336463-supplement-01.pdf [file NIHMS336463-supplement-01.pdf]

**Supplementary Table 2A and 2B.** Frequency distributions of intra- and inter-rater differences in the macroscopic scores of 107 medial (Subtable A) and lateral (Subtable B) menisci for four readers (A, B, C, D). Intra-rater differences (A vs A and C vs C) are differences in replicate scoring by readers A and C respectively, taken at least 3 weeks apart. Inter-rater differences (A vs B, A vs C, A vs D, B vs C, B vs D, C vs D) are (reader 1 – reader 2) scores, using the initial scoring by reader 1.

A. Medial

| Raters | -4 | -3 | -2 | -1 | 0  | 1  | 2  | 3 | 4 |
|--------|----|----|----|----|----|----|----|---|---|
| A vs A | 0  | 0  | 0  | 6  | 93 | 7  | 0  | 0 | 0 |
| C vs C | 0  | 1  | 2  | 12 | 78 | 12 | 1  | 0 | 0 |
| A vs B | 0  | 0  | 9  | 21 | 68 | 7  | 1  | 0 | 0 |
| A vs C | 0  | 2  | 2  | 19 | 65 | 15 | 2  | 0 | 1 |
| A vs D | 0  | 1  | 1  | 29 | 58 | 16 | 1  | 0 | 0 |
| B vs C | 0  | 2  | 2  | 19 | 45 | 25 | 12 | 1 | 0 |
| B vs D | 0  | 1  | 0  | 23 | 51 | 22 | 9  | 0 | 0 |
| C vs D | 1  | 0  | 3  | 27 | 52 | 20 | 2  | 1 | 0 |

B. Lateral

| Raters | -4 | -3 | -2 | -1 | 0  | 1  | 2 | 3 | 4 |
|--------|----|----|----|----|----|----|---|---|---|
| A vs A | 0  | 0  | 0  | 4  | 98 | 4  | 0 | 0 | 0 |
| C vs C | 1  | 0  | 1  | 9  | 86 | 9  | 0 | 0 | 0 |
| A vs B | 0  | 0  | 3  | 27 | 60 | 15 | 1 | 0 | 0 |
| A vs C | 0  | 0  | 0  | 12 | 74 | 15 | 3 | 2 | 0 |
| A vs D | 0  | 0  | 1  | 28 | 66 | 9  | 2 | 0 | 0 |
| B vs C | 0  | 0  | 1  | 22 | 39 | 35 | 7 | 2 | 0 |
| B vs D | 0  | 0  | 1  | 26 | 54 | 23 | 2 | 0 | 0 |
| C vs D | 0  | 1  | 5  | 31 | 57 | 12 | 0 | 0 | 0 |

**Supplementary Table 3A and 3B.** Frequency distributions of intra- and inter-rater differences in the histopathologic scores (Subtable A) and grades (Subtable B) of 222 samples, evaluated by each of 3 readers (A, B, and D). Intra-rater differences (A vs A and B vs B) are differences in replicate scoring or grading by readers A and B respectively, taken at least 3 weeks apart. Inter-rater differences (A vs B, A vs D, B vs D) are (reader 1 – reader 2) scores or grades, using the initial scoring by reader 1.

A. Total Scores

| Raters |  | -4 | -3 | -2 | -1 | 0   | 1  | 2  | 3 | 4 |
|--------|--|----|----|----|----|-----|----|----|---|---|
| A vs A |  | 0  | 0  | 3  | 15 | 193 | 11 | 0  | 0 | 0 |
| B vs B |  | 0  | 0  | 3  | 23 | 162 | 31 | 3  | 0 | 0 |
| A vs B |  | 0  | 0  | 10 | 36 | 99  | 59 | 15 | 3 | 0 |
| A vs D |  | 1  | 3  | 21 | 47 | 97  | 36 | 16 | 1 | 0 |
| B vs D |  | 2  | 9  | 29 | 60 | 62  | 44 | 12 | 4 | 0 |

B. Grades

| Raters |  | -1 | 0   | 1  |
|--------|--|----|-----|----|
| A vs A |  | 4  | 217 | 1  |
| B vs B |  | 6  | 209 | 7  |
| A vs B |  | 10 | 193 | 19 |
| A vs D |  | 23 | 183 | 16 |
| B vs D |  | 34 | 170 | 18 |

**Supplementary Table 4A and 4B.** Intraclass correlation coefficients (ICCs) for 4 readers performing the macroscopic scoring. Intraclass correlation coefficients were determined from n=107 samples, evaluated by each of the four readers. The ICCs summarize inter-reader agreement, with the exception of the (A, A) and (C, C) entries: readers A and C had performed replicate scoring at least 3 weeks apart, so these entries summarize intra-reader agreement. Standard errors of the ICCs are given in parentheses.

**A. Medial**

| <b>Rater</b> |  | <b>A</b>    | <b>B</b>    | <b>C</b>    | <b>D</b>    |
|--------------|--|-------------|-------------|-------------|-------------|
|              |  |             |             |             |             |
| <b>A</b>     |  | .991 (.100) | .955 (.100) | .945 (.100) | .953 (.100) |
| <b>B</b>     |  |             |             | .918 (.100) | .938 (.100) |
| <b>C</b>     |  |             |             | .973 (.100) | .938 (.100) |

**B. Lateral**

| <b>Rater</b> |  | <b>A</b>    | <b>B</b>    | <b>C</b>    | <b>D</b>    |
|--------------|--|-------------|-------------|-------------|-------------|
|              |  |             |             |             |             |
| <b>A</b>     |  | .994 (.100) | .960 (.100) | .956 (.100) | .962 (.100) |
| <b>B</b>     |  |             |             | .923 (.100) | .956 (.100) |
| <b>C</b>     |  |             |             | .969 (.100) | .942 (.100) |

**Supplementary Table 5A and 5B.** Intraclass correlation coefficients (ICCs) for 3 readers performing the histopathologic scoring. Intraclass correlation coefficients were determined from n=222 samples, evaluated by each of the three readers. The ICCs summarize inter-reader agreement, with the exception of the (A, A) and (B, B) entries: readers A and B had performed replicate scoring at least 3 weeks apart, so these entries summarize intra-reader agreement. Standard errors of the ICCs are given in parentheses.

A. Total scores

| <b>Rater</b> |  | <b>A</b>    | <b>B</b>    | <b>D</b>    |
|--------------|--|-------------|-------------|-------------|
|              |  |             |             |             |
| <b>A</b>     |  | .997 (.067) | .980 (.067) | .974 (.067) |
| <b>B</b>     |  |             | .993 (.067) | .960 (.067) |

B. Grades

| <b>Rater</b> |  | <b>A</b>    | <b>B</b>    | <b>D</b>    |
|--------------|--|-------------|-------------|-------------|
|              |  |             |             |             |
| <b>A</b>     |  | .990 (.067) | .942 (.067) | .919 (.067) |
| <b>B</b>     |  |             | .972 (.067) | .887 (.067) |
